# Supplementary material for: Temperature dependence of the absorbance of 185 nm photons by water and commonly occurring solutes and its influence on the VUV advanced oxidation process
Source: Royal Society of Chemistry journal article supplement (doi:10.1039/c8ew00302e), 2018-01-01
Supplement: c8ew00302e1.pdf [file c8ew00302e1.pdf]

## Supplementary Information

The information and data here provided are intended to provide the necessary evidence to support the findings reported in the main article.

### A. 185 nm photon absorption of major solutes

The following figures demonstrate that the solutions of inorganic ions and SRNOM used in the experiments followed the Beer-Lambert Law.

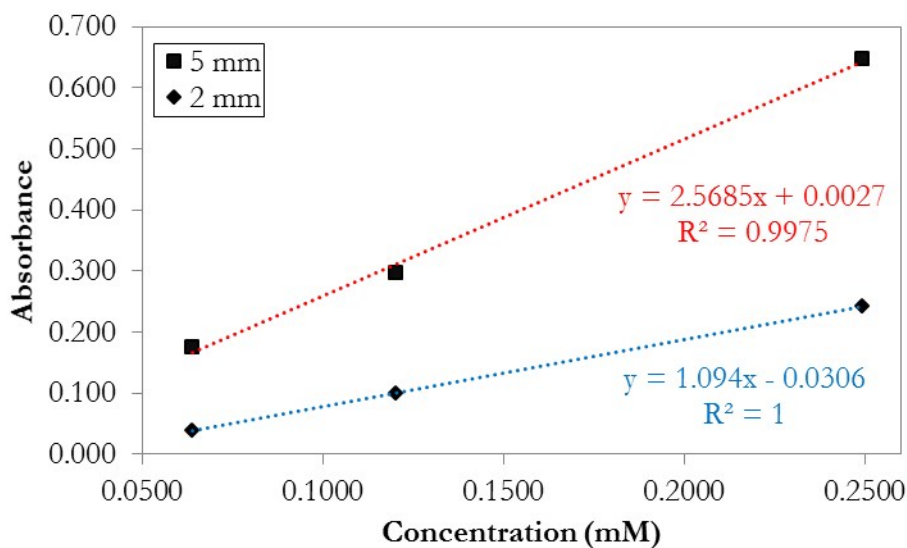

Figure A. 1 Linearity in the absorbance of nitrate solutions at 3.6 °C

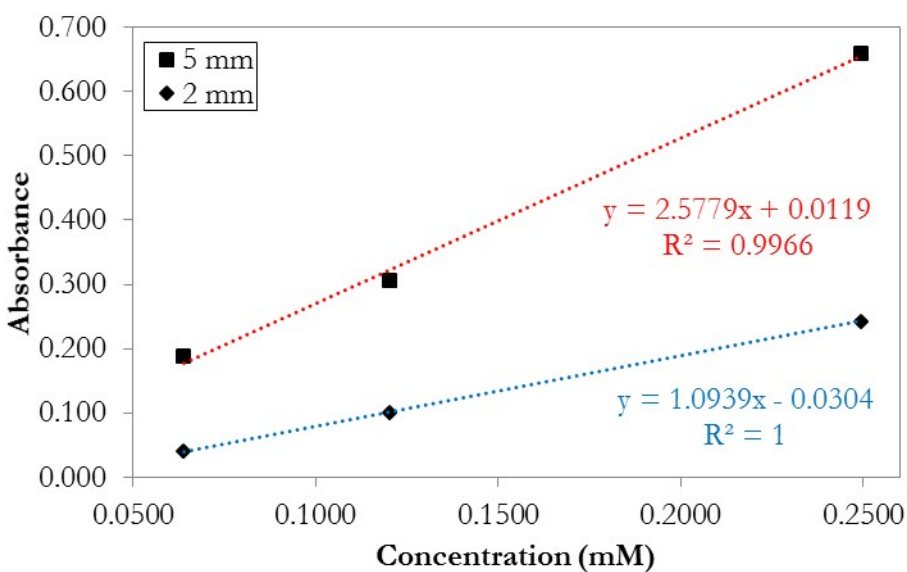

Figure A. 2 Linearity in the absorbance of nitrate solutions at 17.5 °C

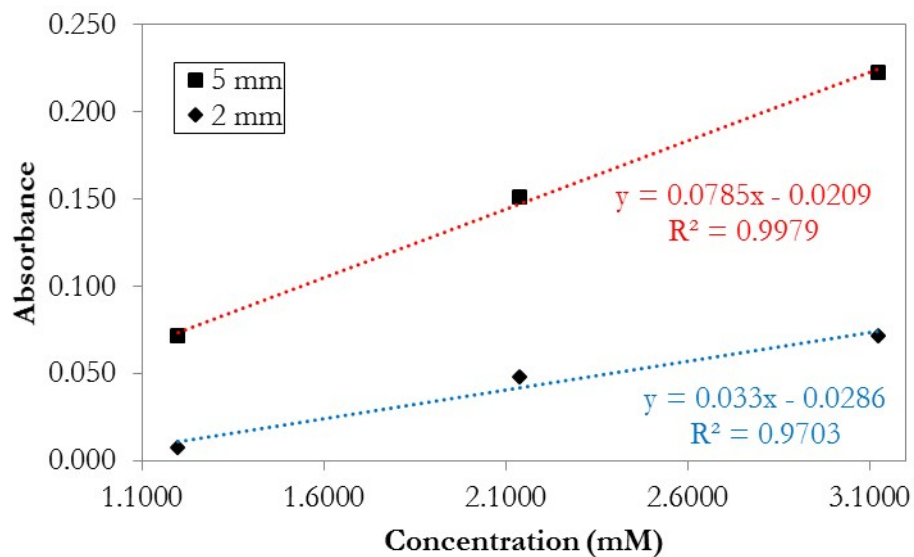

Figure A. 3 Linearity in the absorbance of sulphate solutions at 3.6 °C

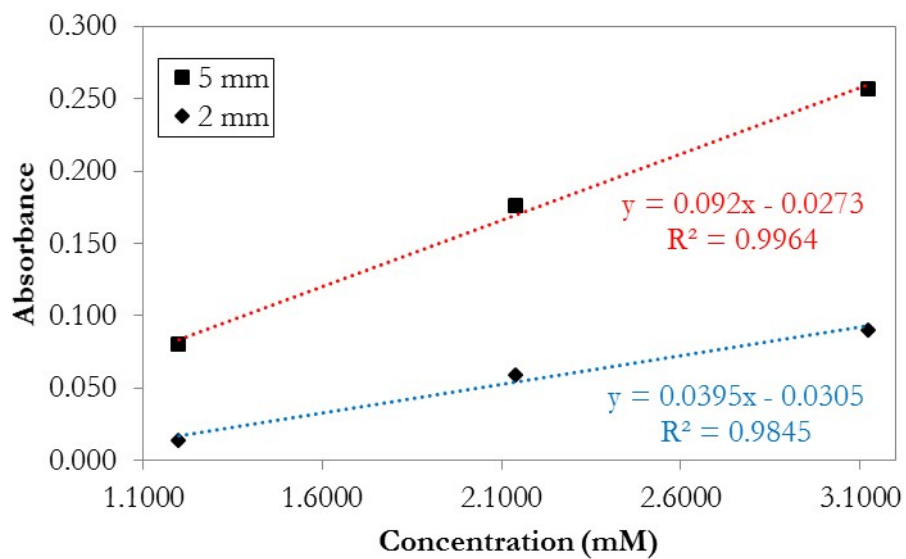

Figure A. 4 Linearity in the absorbance of sulphate solutions at 17.5 °C

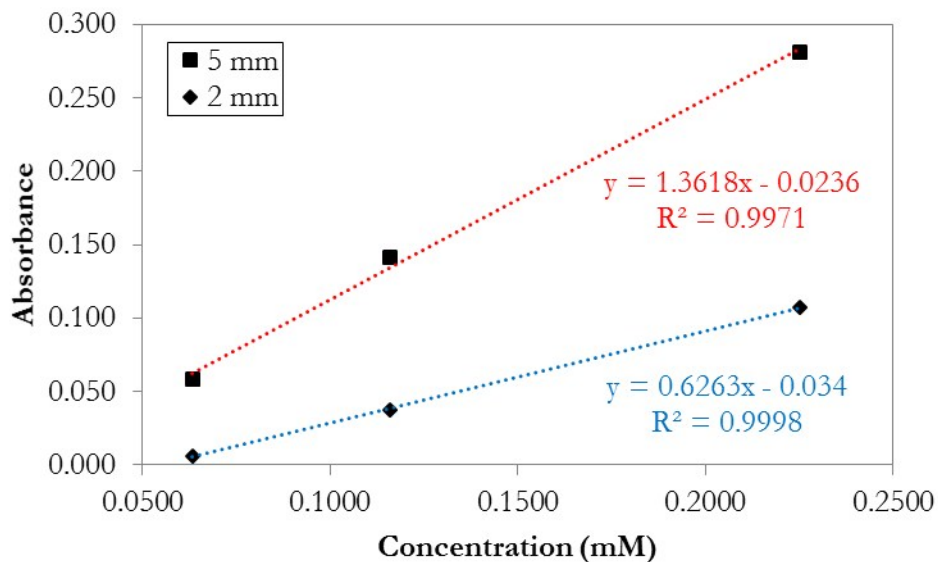

Figure A. 5 Linearity in the absorbance of chloride solutions at 3.6 °C

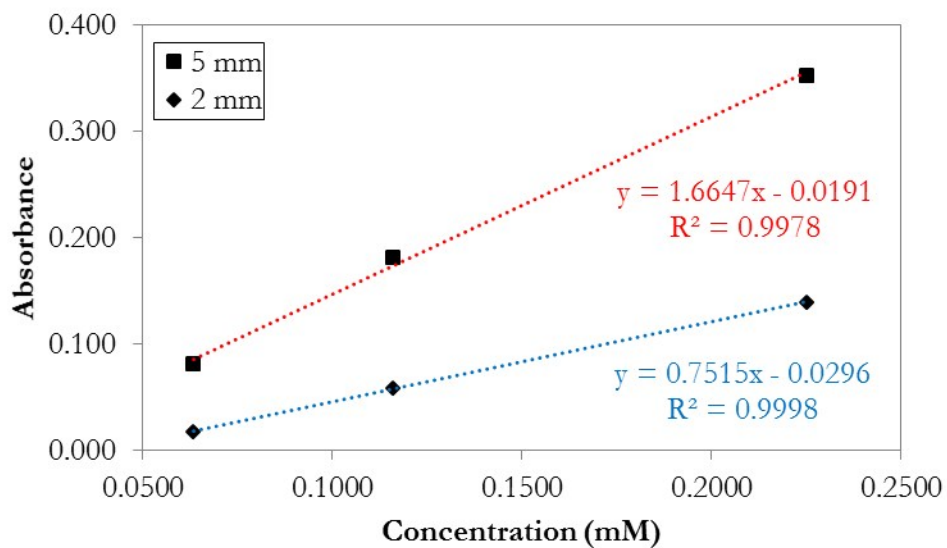

Figure A. 6 Linearity in the absorbance of chloride solutions at 17.5 °C

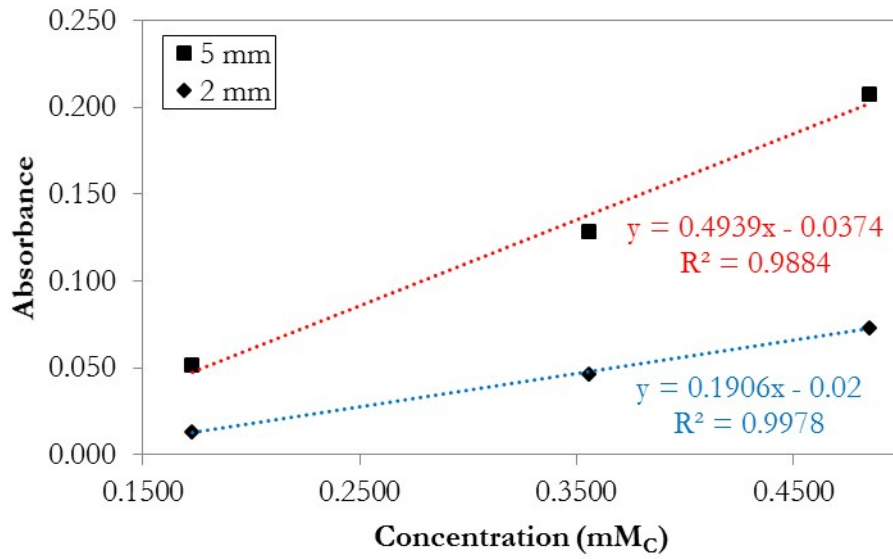

Figure A. 7 Linearity in the absorbance of SRNOM solutions at 3.6 °C

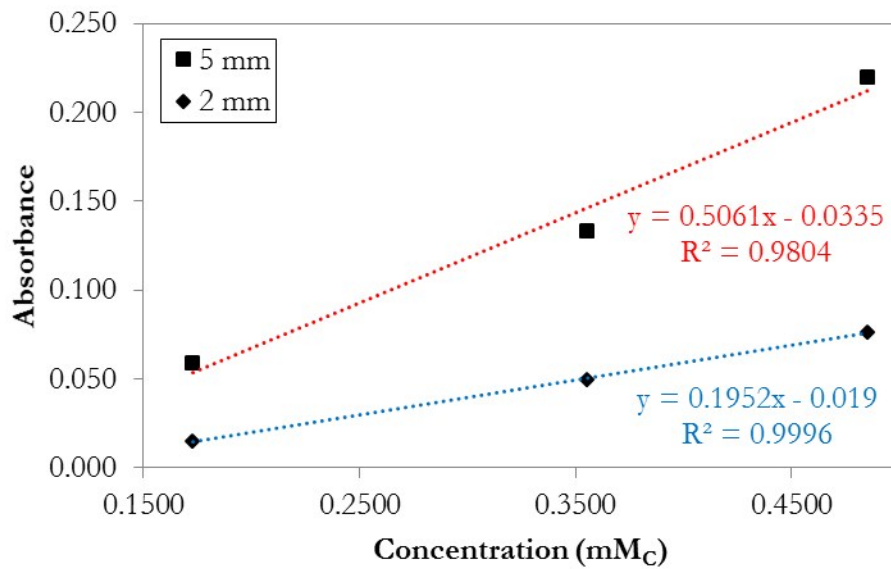

Figure A. 8 Linearity in the absorbance of SRNOM solutions at 17.5 °C

## B. Corrections to the absorbance measurements

Due to the passage of radiation through different media, reflection losses have to be taken into account before reporting the measured value of absorbance. The Fresnel relation for the fraction reflected was calculated as shown by equation B.1, where  $n_i$  is the refractive media of the phases involved. The refractive index values used are shown in Table B.1.

$$f = \left( \frac{n_1 - n_2}{n_1 + n_2} \right)^2 \quad (\text{B.1})$$

Table B. 1 Refractive index used in the calculation of the Fresnel relation

| Media        | Refractive Index (n) | Reference |
|--------------|----------------------|-----------|
| Fused-Quartz | 1.57505              | (1)       |
| Nitrogen     | 1.0003515            | (2)       |
| Water        | 1.458039             | (3)       |

According to Goldring et al., (1953)<sup>(4)</sup>, the true absorbance,  $A_0$ , can be calculated from

$$A_0 = A' - 0.434 \cdot (1 - T^2) \cdot \left( \frac{f_1 \cdot f_2}{1 - f_1} \right) \quad (\text{B.2})$$

with,

$$A' = \log \left( \frac{I_0}{I} \right) \quad (\text{B.3})$$

$$T = \frac{I}{I_0} \quad (\text{B.4})$$

For instance, at 3.6 °C for pure water and an aqueous solution of sodium nitrate with a concentration of  $0.0639 \pm 0.0007$  mM the data shown in Table B.2 was obtained.

Table B. 2 Measured irradiance at 3.6 C and a path length of 0.2 cm for pure water and an aqueous sodium nitrate solution

| Component      | Irradiance (W cm <sup>-2</sup> ) |
|----------------|----------------------------------|
| Water          | $1.493 \times 10^{-4}$           |
| Sodium Nitrate | $1.355 \times 10^{-4}$           |

Nitrogen was used as a reference to obtain the absorption coefficient of water. With a path length of 0.2 cm, an irradiance value of  $2.00 \times 10^{-4}$  W cm<sup>-2</sup> was measured. This value was observed to be constant regardless of the cuvette holder temperature, but increased with path length.

Following equations B.1, B.2, B.3 and B.4 the true absorbance can be calculated. A summary of the intermediate and final values are shown in table B.3

Table B. 3 Intermediate parameters and corrected absorbance values for water and sodium nitrate solution at 3.6 °C and a path length of 0.2 cm

| <b>Component</b> | <b>Reference Irradiance (W cm<sup>-2</sup>)</b> | <b>f<sub>1</sub></b> | <b>f<sub>2</sub></b> | <b>A'</b> | <b>T</b> | <b>A<sub>0</sub></b> |
|------------------|-------------------------------------------------|----------------------|----------------------|-----------|----------|----------------------|
| Water            | 2.00x10 <sup>-4</sup>                           | 0.04980              | 0.04980              | 0.127     | 0.7465   | 0.126                |
| Sodium Nitrate   | 1.488x10 <sup>-4</sup>                          | 0.04980              | 0.00149              | 0.041     | 0.9106   | 0.041                |

The factor f<sub>1</sub> and f<sub>2</sub> accounts for the transmission of 185 nm from N<sub>2</sub> to suprasil and from suprasil to water, respectively. In case of water f<sub>1</sub> equals f<sub>2</sub> as the reference for water was the cuvette filled with nitrogen.

### C. Raw irradiance data

This section provides the tabulated raw data collected for pure water, nitrate, sulphate, chloride, Suwannee River NOM solutions and raw surface water at different path lengths, concentration and temperatures.

#### *Water*

| <b>Path length = 1 cm</b>           |                    | <b>Reading (W cm<sup>-2</sup>)</b> |                    |  |
|-------------------------------------|--------------------|------------------------------------|--------------------|--|
| <b>Water Temperature (°C)</b>       | <b>Replicate 1</b> | <b>Replicate 2</b>                 | <b>Replicate 3</b> |  |
| 3.5                                 | 3.040E-05          | 3.170E-05                          | 3.260E-05          |  |
| 3.6                                 | 3.035E-05          | 3.150E-05                          | 3.240E-05          |  |
| 3.7                                 | 3.025E-05          | 3.130E-05                          | 3.220E-05          |  |
| 4.0                                 | 2.970E-05          | 3.085E-05                          | 3.150E-05          |  |
| 17.4                                | 1.194E-05          | 1.275E-05                          | 1.284E-05          |  |
| 17.5                                | 1.185E-05          | 1.267E-05                          | 1.280E-05          |  |
| 17.6                                | 1.179E-05          | 1.257E-05                          | 1.273E-05          |  |
| 25.0                                | 6.64E-06           | 7.02E-06                           | 7.15E-06           |  |
| <i>N<sub>2</sub> filled cuvette</i> | <i>2.08E-04</i>    | <i>2.13E-04</i>                    | <i>2.23E-04</i>    |  |
| <b>Path length = 0.5 cm</b>         |                    | <b>Reading (W cm<sup>-2</sup>)</b> |                    |  |
| <b>Water Temperature (°C)</b>       | <b>Replicate 1</b> | <b>Replicate 2</b>                 | <b>Replicate 3</b> |  |
| 3.5                                 | 7.610E-05          | 7.610E-05                          | 7.440E-05          |  |
| 3.6                                 | 7.620E-05          | 7.570E-05                          | 7.420E-05          |  |
| 3.7                                 | 7.570E-05          | 7.580E-05                          | 7.390E-05          |  |
| 4.0                                 | 7.520E-05          | 7.510E-05                          | 7.360E-05          |  |
| 17.4                                | 4.540E-05          | 4.570E-05                          | 4.550E-05          |  |
| 17.5                                | 4.530E-05          | 4.550E-05                          | 4.515E-05          |  |
| 17.6                                | 4.515E-05          | 4.520E-05                          | 4.485E-05          |  |
| 25.0                                | 3.17E-05           | 3.17E-05                           | 3.18E-05           |  |
| <i>N<sub>2</sub> filled cuvette</i> | <i>2.01E-04</i>    | <i>2.13E-04</i>                    | <i>2.14E-04</i>    |  |
| <b>Path length = 0.2 cm</b>         |                    | <b>Reading (W cm<sup>-2</sup>)</b> |                    |  |
| <b>Water Temperature (°C)</b>       | <b>Replicate 1</b> | <b>Replicate 2</b>                 | <b>Replicate 3</b> |  |
| 3.5                                 | 1.496E-04          | 1.492E-04                          | 1.484E-04          |  |
| 3.6                                 | 1.493E-04          | 1.489E-04                          | 1.482E-04          |  |
| 3.7                                 | 1.491E-04          | 1.484E-04                          | 1.480E-04          |  |
| 4.0                                 | 1.489E-04          | 1.482E-04                          | 1.474E-04          |  |
| 17.4                                | 1.197E-04          | 1.200E-04                          | 1.198E-04          |  |
| 17.5                                | 1.195E-04          | 1.197E-04                          | 1.194E-04          |  |
| 17.6                                | 1.193E-04          | 1.191E-04                          | 1.192E-04          |  |
| 25.0                                | 1.01E-04           | 1.02E-04                           | 1.02E-04           |  |
| <i>N<sub>2</sub> filled cuvette</i> | <i>2.00E-04</i>    | <i>2.00E-04</i>                    | <i>2.00E-04</i>    |  |

**Nitrate**

Path length = 0.2 cm

| <b>[NO<sub>3</sub><sup>-</sup>] = 0.0639 ± 0.0007 mM</b> |                                  | <b>Reading (W cm<sup>-2</sup>)</b> |                    |                    |
|----------------------------------------------------------|----------------------------------|------------------------------------|--------------------|--------------------|
| <b>Water Temperature (°C)</b>                            | <b>Reference (I<sub>0</sub>)</b> | <b>Replicate 1</b>                 | <b>Replicate 2</b> | <b>Replicate 3</b> |
| 3.5                                                      | 1.491E-04                        | 1.358E-04                          | 1.369E-04          | 1.361E-04          |
| 3.6                                                      | 1.488E-04                        | 1.355E-04                          | 1.363E-04          | 1.358E-04          |
| 3.7                                                      | 1.485E-04                        | 1.352E-04                          | 1.363E-04          | 1.355E-04          |
| 4.0                                                      | 1.482E-04                        | 1.343E-04                          | 1.359E-04          | 1.346E-04          |
| 17.4                                                     | 1.198E-04                        | 1.088E-04                          | 1.095E-04          | 1.096E-04          |
| 17.5                                                     | 1.195E-04                        | 1.086E-04                          | 1.093E-04          | 1.093E-04          |
| 17.6                                                     | 1.192E-04                        | 1.083E-04                          | 1.089E-04          | 1.086E-04          |
| 25.0                                                     | 1.016E-04                        | 9.290E-05                          | 9.310E-05          | 9.320E-05          |
| <hr/>                                                    |                                  |                                    |                    |                    |
| <b>[NO<sub>3</sub><sup>-</sup>] = 0.1201 ± 0.0003 mM</b> |                                  | <b>Reading (W cm<sup>-2</sup>)</b> |                    |                    |
| <b>Water Temperature (°C)</b>                            | <b>Reference (I<sub>0</sub>)</b> | <b>Replicate 1</b>                 | <b>Replicate 2</b> | <b>Replicate 3</b> |
| 3.5                                                      | 1.491E-04                        | 1.189E-04                          | 1.185E-04          | 1.176E-04          |
| 3.6                                                      | 1.488E-04                        | 1.186E-04                          | 1.182E-04          | 1.174E-04          |
| 3.7                                                      | 1.485E-04                        | 1.183E-04                          | 1.172E-04          | 1.172E-04          |
| 4.0                                                      | 1.482E-04                        | 1.179E-04                          | 1.166E-04          | 1.168E-04          |
| 17.4                                                     | 1.198E-04                        | 9.580E-05                          | 9.480E-05          | 9.460E-05          |
| 17.5                                                     | 1.195E-04                        | 9.560E-05                          | 9.450E-05          | 9.430E-05          |
| 17.6                                                     | 1.192E-04                        | 9.520E-05                          | 9.380E-05          | 9.380E-05          |
| 25.0                                                     | 1.016E-04                        | 8.120E-05                          | 8.080E-05          | 8.020E-05          |
| <hr/>                                                    |                                  |                                    |                    |                    |
| <b>[NO<sub>3</sub><sup>-</sup>] = 0.2493 ± 0.0008 mM</b> |                                  | <b>Reading (W cm<sup>-2</sup>)</b> |                    |                    |
| <b>Water Temperature (°C)</b>                            | <b>Reference (I<sub>0</sub>)</b> | <b>Replicate 1</b>                 | <b>Replicate 2</b> | <b>Replicate 3</b> |
| 3.5                                                      | 1.491E-04                        | 8.580E-05                          | 8.430E-05          | 8.650E-05          |
| 3.6                                                      | 1.488E-04                        | 8.550E-05                          | 8.410E-05          | 8.600E-05          |
| 3.7                                                      | 1.485E-04                        | 8.510E-05                          | 8.380E-05          | 8.560E-05          |
| 4.0                                                      | 1.482E-04                        | 8.420E-05                          | 8.300E-05          | 8.480E-05          |
| 17.4                                                     | 1.198E-04                        | 6.880E-05                          | 6.800E-05          | 6.920E-05          |
| 17.5                                                     | 1.195E-04                        | 6.850E-05                          | 6.780E-05          | 6.890E-05          |
| 17.6                                                     | 1.192E-04                        | 6.830E-05                          | 6.750E-05          | 6.850E-05          |
| 25.0                                                     | 1.016E-04                        | 5.880E-05                          | 5.850E-05          | 5.880E-05          |



Path length = 0.5 cm

| <b>[NO<sub>3</sub><sup>-</sup>] = 0.0639 ± 0.0007 mM</b> |                                  | <b>Reading (W cm<sup>-2</sup>)</b> |                    |                    |
|----------------------------------------------------------|----------------------------------|------------------------------------|--------------------|--------------------|
| <b>Water Temperature (°C)</b>                            | <b>Reference (I<sub>0</sub>)</b> | <b>Replicate 1</b>                 | <b>Replicate 2</b> | <b>Replicate 3</b> |
| 3.5                                                      | 7.553E-05                        | 5.040E-05                          | 5.050E-05          | 5.040E-05          |
| 3.6                                                      | 7.537E-05                        | 5.020E-05                          | 5.020E-05          | 5.020E-05          |
| 3.7                                                      | 7.513E-05                        | 4.940E-05                          | 4.980E-05          | 4.980E-05          |
| 4.0                                                      | 7.463E-05                        | 4.870E-05                          | 4.950E-05          | 4.910E-05          |
| 17.4                                                     | 4.553E-05                        | 2.950E-05                          | 2.970E-05          | 2.970E-05          |
| 17.5                                                     | 4.532E-05                        | 2.930E-05                          | 2.940E-05          | 2.950E-05          |
| 17.6                                                     | 4.507E-05                        | 2.900E-05                          | 2.930E-05          | 2.930E-05          |
| 25.0                                                     | 3.172E-05                        | 2.000E-05                          | 2.020E-05          | 2.010E-05          |
| <hr/>                                                    |                                  |                                    |                    |                    |
| <b>[NO<sub>3</sub><sup>-</sup>] = 0.1201 ± 0.0003 mM</b> |                                  | <b>Reading (W cm<sup>-2</sup>)</b> |                    |                    |
| <b>Water Temperature (°C)</b>                            | <b>Reference (I<sub>0</sub>)</b> | <b>Replicate 1</b>                 | <b>Replicate 2</b> | <b>Replicate 3</b> |
| 3.5                                                      | 7.553E-05                        | 3.760E-05                          | 3.880E-05          | 3.830E-05          |
| 3.6                                                      | 7.537E-05                        | 3.740E-05                          | 3.850E-05          | 3.810E-05          |
| 3.7                                                      | 7.513E-05                        | 3.710E-05                          | 3.830E-05          | 3.770E-05          |
| 4.0                                                      | 7.463E-05                        | 3.650E-05                          | 3.770E-05          | 3.720E-05          |
| 17.4                                                     | 4.553E-05                        | 2.230E-05                          | 2.290E-05          | 2.270E-05          |
| 17.5                                                     | 4.532E-05                        | 2.210E-05                          | 2.270E-05          | 2.250E-05          |
| 17.6                                                     | 4.507E-05                        | 2.180E-05                          | 2.250E-05          | 2.230E-05          |
| 25.0                                                     | 3.172E-05                        | 1.506E-05                          | 1.561E-05          | 1.553E-05          |
| <hr/>                                                    |                                  |                                    |                    |                    |
| <b>[NO<sub>3</sub><sup>-</sup>] = 0.2493 ± 0.0008 mM</b> |                                  | <b>Reading (W cm<sup>-2</sup>)</b> |                    |                    |
| <b>Water Temperature (°C)</b>                            | <b>Reference (I<sub>0</sub>)</b> | <b>Replicate 1</b>                 | <b>Replicate 2</b> | <b>Replicate 3</b> |
| 3.5                                                      | 7.553E-05                        | 1.721E-05                          | 1.694E-05          | 1.760E-05          |
| 3.6                                                      | 7.537E-05                        | 1.666E-05                          | 1.686E-05          | 1.744E-05          |
| 3.7                                                      | 7.513E-05                        | 1.654E-05                          | 1.674E-05          | 1.725E-05          |
| 4.0                                                      | 7.463E-05                        | 1.623E-05                          | 1.651E-05          | 1.694E-05          |
| 17.4                                                     | 4.553E-05                        | 9.750E-06                          | 1.001E-05          | 1.028E-05          |
| 17.5                                                     | 4.532E-05                        | 9.670E-06                          | 9.950E-06          | 1.017E-05          |
| 17.6                                                     | 4.507E-05                        | 9.620E-06                          | 9.880E-06          | 1.009E-05          |
| 25.0                                                     | 3.172E-05                        | 6.630E-06                          | 6.820E-06          | 7.020E-06          |

**Sulphate**

Path length = 0.2 cm

| <b>[SO<sub>4</sub><sup>2-</sup>] = 1.1993 ± 0.0240 mM</b> |                                  | <b>Reading (W cm<sup>-2</sup>)</b> |                    |                    |
|-----------------------------------------------------------|----------------------------------|------------------------------------|--------------------|--------------------|
| <b>Water Temperature (°C)</b>                             | <b>Reference (I<sub>0</sub>)</b> | <b>Replicate 1</b>                 | <b>Replicate 2</b> | <b>Replicate 3</b> |
| 3.5                                                       | 1.491E-04                        | 1.461E-04                          | 1.468E-04          | 1.469E-04          |
| 3.6                                                       | 1.488E-04                        | 1.459E-04                          | 1.464E-04          | 1.463E-04          |
| 3.7                                                       | 1.485E-04                        | 1.456E-04                          | 1.461E-04          | 1.459E-04          |
| 4.0                                                       | 1.482E-04                        | 1.447E-04                          | 1.453E-04          | 1.446E-04          |
| 17.4                                                      | 1.198E-04                        | 1.158E-04                          | 1.166E-04          | 1.157E-04          |
| 17.5                                                      | 1.195E-04                        | 1.154E-04                          | 1.164E-04          | 1.154E-04          |
| 17.6                                                      | 1.192E-04                        | 1.148E-04                          | 1.160E-04          | 1.151E-04          |
| 25.0                                                      | 1.016E-04                        | 9.780E-05                          | 9.820E-05          | 9.740E-05          |
| <hr/>                                                     |                                  |                                    |                    |                    |
| <b>[SO<sub>4</sub><sup>2-</sup>] = 2.1391 ± 0.0208 mM</b> |                                  | <b>Reading (W cm<sup>-2</sup>)</b> |                    |                    |
| <b>Water Temperature (°C)</b>                             | <b>Reference (I<sub>0</sub>)</b> | <b>Replicate 1</b>                 | <b>Replicate 2</b> | <b>Replicate 3</b> |
| 3.5                                                       | 1.491E-04                        | 1.339E-04                          | 1.336E-04          | 1.328E-04          |
| 3.6                                                       | 1.488E-04                        | 1.334E-04                          | 1.334E-04          | 1.326E-04          |
| 3.7                                                       | 1.485E-04                        | 1.331E-04                          | 1.330E-04          | 1.322E-04          |
| 4.0                                                       | 1.482E-04                        | 1.321E-04                          | 1.323E-04          | 1.318E-04          |
| 17.4                                                      | 1.198E-04                        | 1.043E-04                          | 1.051E-04          | 1.043E-04          |
| 17.5                                                      | 1.195E-04                        | 1.042E-04                          | 1.044E-04          | 1.041E-04          |
| 17.6                                                      | 1.192E-04                        | 1.039E-04                          | 1.041E-04          | 1.038E-04          |
| 25.0                                                      | 1.016E-04                        | 8.770E-05                          | 8.830E-05          | 8.810E-05          |
| <hr/>                                                     |                                  |                                    |                    |                    |
| <b>[SO<sub>4</sub><sup>2-</sup>] = 3.1228 ± 0.0117 mM</b> |                                  | <b>Reading (W cm<sup>-2</sup>)</b> |                    |                    |
| <b>Water Temperature (°C)</b>                             | <b>Reference (I<sub>0</sub>)</b> | <b>Replicate 1</b>                 | <b>Replicate 2</b> | <b>Replicate 3</b> |
| 3.5                                                       | 1.491E-04                        | 1.268E-04                          | 1.269E-04          | 1.261E-04          |
| 3.6                                                       | 1.488E-04                        | 1.265E-04                          | 1.266E-04          | 1.258E-04          |
| 3.7                                                       | 1.485E-04                        | 1.261E-04                          | 1.264E-04          | 1.256E-04          |
| 4.0                                                       | 1.482E-04                        | 1.254E-04                          | 1.256E-04          | 1.248E-04          |
| 17.4                                                      | 1.198E-04                        | 9.740E-05                          | 9.800E-05          | 9.680E-05          |
| 17.5                                                      | 1.195E-04                        | 9.700E-05                          | 9.780E-05          | 9.660E-05          |
| 17.6                                                      | 1.192E-04                        | 9.670E-05                          | 9.760E-05          | 9.640E-05          |
| 25.0                                                      | 1.016E-04                        | 8.100E-05                          | 8.240E-05          | 8.050E-05          |

Path length = 0.5 cm

| <b>[SO<sub>4</sub><sup>2-</sup>] = 1.1993 ± 0.0240 mM</b> |                                  | <b>Reading (W cm<sup>-2</sup>)</b> |                    |                    |
|-----------------------------------------------------------|----------------------------------|------------------------------------|--------------------|--------------------|
| <b>Water Temperature (°C)</b>                             | <b>Reference (I<sub>0</sub>)</b> | <b>Replicate 1</b>                 | <b>Replicate 2</b> | <b>Replicate 3</b> |
| 3.5                                                       | 7.553E-05                        | 6.460E-05                          | 6.420E-05          | 6.370E-05          |
| 3.6                                                       | 7.537E-05                        | 6.420E-05                          | 6.420E-05          | 6.350E-05          |
| 3.7                                                       | 7.513E-05                        | 6.400E-05                          | 6.400E-05          | 6.330E-05          |
| 4.0                                                       | 7.463E-05                        | 6.380E-05                          | 6.380E-05          | 6.290E-05          |
| 17.4                                                      | 4.553E-05                        | 3.870E-05                          | 3.790E-05          | 3.710E-05          |
| 17.5                                                      | 4.532E-05                        | 3.850E-05                          | 3.770E-05          | 3.690E-05          |
| 17.6                                                      | 4.507E-05                        | 3.830E-05                          | 3.750E-05          | 3.640E-05          |
| 25.0                                                      | 3.172E-05                        | 2.680E-05                          | 2.580E-05          | 2.500E-05          |
| <b>[SO<sub>4</sub><sup>2-</sup>] = 2.1391 ± 0.0208 mM</b> |                                  | <b>Reading (W cm<sup>-2</sup>)</b> |                    |                    |
| <b>Water Temperature (°C)</b>                             | <b>Reference (I<sub>0</sub>)</b> | <b>Replicate 1</b>                 | <b>Replicate 2</b> | <b>Replicate 3</b> |
| 3.5                                                       | 7.553E-05                        | 5.230E-05                          | 5.410E-05          | 5.410E-05          |
| 3.6                                                       | 7.537E-05                        | 5.210E-05                          | 5.380E-05          | 5.380E-05          |
| 3.7                                                       | 7.513E-05                        | 5.180E-05                          | 5.350E-05          | 5.350E-05          |
| 4.0                                                       | 7.463E-05                        | 5.080E-05                          | 5.300E-05          | 5.310E-05          |
| 17.4                                                      | 4.553E-05                        | 2.970E-05                          | 3.090E-05          | 3.080E-05          |
| 17.5                                                      | 4.532E-05                        | 2.950E-05                          | 3.060E-05          | 3.060E-05          |
| 17.6                                                      | 4.507E-05                        | 2.970E-05                          | 3.030E-05          | 3.040E-05          |
| 25.0                                                      | 3.172E-05                        | 2.010E-05                          | 2.060E-05          | 2.070E-05          |
| <b>[SO<sub>4</sub><sup>2-</sup>] = 3.1228 ± 0.0117 mM</b> |                                  | <b>Reading (W cm<sup>-2</sup>)</b> |                    |                    |
| <b>Water Temperature (°C)</b>                             | <b>Reference (I<sub>0</sub>)</b> | <b>Replicate 1</b>                 | <b>Replicate 2</b> | <b>Replicate 3</b> |
| 3.5                                                       | 7.553E-05                        | 4.490E-05                          | 4.590E-05          | 4.510E-05          |
| 3.6                                                       | 7.537E-05                        | 4.470E-05                          | 4.580E-05          | 4.500E-05          |
| 3.7                                                       | 7.513E-05                        | 4.450E-05                          | 4.570E-05          | 4.480E-05          |
| 4.0                                                       | 7.463E-05                        | 4.410E-05                          | 4.510E-05          | 4.440E-05          |
| 17.4                                                      | 4.553E-05                        | 2.490E-05                          | 2.560E-05          | 2.510E-05          |
| 17.5                                                      | 4.532E-05                        | 2.480E-05                          | 2.540E-05          | 2.500E-05          |
| 17.6                                                      | 4.507E-05                        | 2.460E-05                          | 2.520E-05          | 2.470E-05          |
| 25.0                                                      | 3.172E-05                        | 1.651E-05                          | 1.684E-05          | 1.660E-05          |

**Chloride**

Path length = 0.2 cm

| <b>[Cl<sup>-</sup>] = 0.0633 ± 0.0003 mM</b> |                                  | <b>Reading (W cm<sup>-2</sup>)</b> |                    |                    |
|----------------------------------------------|----------------------------------|------------------------------------|--------------------|--------------------|
| <b>Water Temperature (°C)</b>                | <b>Reference (I<sub>0</sub>)</b> | <b>Replicate 1</b>                 | <b>Replicate 2</b> | <b>Replicate 3</b> |
| 3.5                                          | 1.491E-04                        | 1.469E-04                          | 1.474E-04          | 1.469E-04          |
| 3.6                                          | 1.488E-04                        | 1.466E-04                          | 1.470E-04          | 1.465E-04          |
| 3.7                                          | 1.485E-04                        | 1.464E-04                          | 1.467E-04          | 1.462E-04          |
| 4.0                                          | 1.482E-04                        | 1.456E-04                          | 1.460E-04          | 1.456E-04          |
| 17.4                                         | 1.198E-04                        | 1.156E-04                          | 1.157E-04          | 1.148E-04          |
| 17.5                                         | 1.195E-04                        | 1.150E-04                          | 1.150E-04          | 1.146E-04          |
| 17.6                                         | 1.192E-04                        | 1.147E-04                          | 1.147E-04          | 1.143E-04          |
| 25.0                                         | 1.016E-04                        | 9.680E-05                          | 9.680E-05          | 9.640E-05          |
| <hr/>                                        |                                  |                                    |                    |                    |
| <b>[Cl<sup>-</sup>] = 0.1159 ± 0.0002 mM</b> |                                  | <b>Reading (W cm<sup>-2</sup>)</b> |                    |                    |
| <b>Water Temperature (°C)</b>                | <b>Reference (I<sub>0</sub>)</b> | <b>Replicate 1</b>                 | <b>Replicate 2</b> | <b>Replicate 3</b> |
| 3.5                                          | 1.491E-04                        | 1.377E-04                          | 1.363E-04          | 1.365E-04          |
| 3.6                                          | 1.488E-04                        | 1.370E-04                          | 1.359E-04          | 1.363E-04          |
| 3.7                                          | 1.485E-04                        | 1.364E-04                          | 1.356E-04          | 1.361E-04          |
| 4.0                                          | 1.482E-04                        | 1.356E-04                          | 1.344E-04          | 1.356E-04          |
| 17.4                                         | 1.198E-04                        | 1.048E-04                          | 1.043E-04          | 1.053E-04          |
| 17.5                                         | 1.195E-04                        | 1.043E-04                          | 1.041E-04          | 1.050E-04          |
| 17.6                                         | 1.192E-04                        | 1.039E-04                          | 1.037E-04          | 1.048E-04          |
| 25.0                                         | 1.016E-04                        | 8.600E-05                          | 8.580E-05          | 8.680E-05          |
| <hr/>                                        |                                  |                                    |                    |                    |
| <b>[Cl<sup>-</sup>] = 0.2250 ± 0.0016 mM</b> |                                  | <b>Reading (W cm<sup>-2</sup>)</b> |                    |                    |
| <b>Water Temperature (°C)</b>                | <b>Reference (I<sub>0</sub>)</b> | <b>Replicate 1</b>                 | <b>Replicate 2</b> | <b>Replicate 3</b> |
| 3.5                                          | 1.491E-04                        | 1.164E-04                          | 1.165E-04          | 1.164E-04          |
| 3.6                                          | 1.488E-04                        | 1.161E-04                          | 1.165E-04          | 1.162E-04          |
| 3.7                                          | 1.485E-04                        | 1.156E-04                          | 1.158E-04          | 1.158E-04          |
| 4.0                                          | 1.482E-04                        | 1.153E-04                          | 1.151E-04          | 1.151E-04          |
| 17.4                                         | 1.198E-04                        | 8.690E-05                          | 8.700E-05          | 8.720E-05          |
| 17.5                                         | 1.195E-04                        | 8.650E-05                          | 8.680E-05          | 8.700E-05          |
| 17.6                                         | 1.192E-04                        | 8.600E-05                          | 8.660E-05          | 8.660E-05          |
| 25.0                                         | 1.016E-04                        | 7.050E-05                          | 7.190E-05          | 7.170E-05          |

Path length = 0.5 cm

| <b>[Cl<sup>-</sup>] = 0.0633 ± 0.0003 mM</b> |                                  | <b>Reading (W cm<sup>-2</sup>)</b> |                    |                    |
|----------------------------------------------|----------------------------------|------------------------------------|--------------------|--------------------|
| <b>Water Temperature (°C)</b>                | <b>Reference (I<sub>0</sub>)</b> | <b>Replicate 1</b>                 | <b>Replicate 2</b> | <b>Replicate 3</b> |
| 3.5                                          | 7.553E-05                        | 6.590E-05                          | 6.680E-05          | 6.570E-05          |
| 3.6                                          | 7.537E-05                        | 6.560E-05                          | 6.670E-05          | 6.550E-05          |
| 3.7                                          | 7.513E-05                        | 6.530E-05                          | 6.640E-05          | 6.520E-05          |
| 4.0                                          | 7.463E-05                        | 6.500E-05                          | 6.580E-05          | 6.460E-05          |
| 17.4                                         | 4.553E-05                        | 3.780E-05                          | 3.820E-05          | 3.760E-05          |
| 17.5                                         | 4.532E-05                        | 3.740E-05                          | 3.790E-05          | 3.740E-05          |
| 17.6                                         | 4.507E-05                        | 3.700E-05                          | 3.760E-05          | 3.710E-05          |
| 25.0                                         | 3.172E-05                        | 2.500E-05                          | 2.550E-05          | 2.520E-05          |
| <b>[Cl<sup>-</sup>] = 0.1159 ± 0.0002 mM</b> |                                  | <b>Reading (W cm<sup>-2</sup>)</b> |                    |                    |
| <b>Water Temperature (°C)</b>                | <b>Reference (I<sub>0</sub>)</b> | <b>Replicate 1</b>                 | <b>Replicate 2</b> | <b>Replicate 3</b> |
| 3.5                                          | 7.553E-05                        | 5.520E-05                          | 5.450E-05          | 5.450E-05          |
| 3.6                                          | 7.537E-05                        | 5.480E-05                          | 5.430E-05          | 5.430E-05          |
| 3.7                                          | 7.513E-05                        | 5.450E-05                          | 5.400E-05          | 5.410E-05          |
| 4.0                                          | 7.463E-05                        | 5.410E-05                          | 5.340E-05          | 5.360E-05          |
| 17.4                                         | 4.553E-05                        | 3.040E-05                          | 3.000E-05          | 3.020E-05          |
| 17.5                                         | 4.532E-05                        | 2.990E-05                          | 2.970E-05          | 3.000E-05          |
| 17.6                                         | 4.507E-05                        | 2.970E-05                          | 2.950E-05          | 2.980E-05          |
| 25.0                                         | 3.172E-05                        | 1.967E-05                          | 1.950E-05          | 1.983E-05          |
| <b>[Cl<sup>-</sup>] = 0.2250 ± 0.0016 mM</b> |                                  | <b>Reading (W cm<sup>-2</sup>)</b> |                    |                    |
| <b>Water Temperature (°C)</b>                | <b>Reference (I<sub>0</sub>)</b> | <b>Replicate 1</b>                 | <b>Replicate 2</b> | <b>Replicate 3</b> |
| 3.5                                          | 7.553E-05                        | 4.000E-05                          | 3.960E-05          | 3.970E-05          |
| 3.6                                          | 7.537E-05                        | 3.970E-05                          | 3.940E-05          | 3.940E-05          |
| 3.7                                          | 7.513E-05                        | 3.970E-05                          | 3.940E-05          | 3.930E-05          |
| 4.0                                          | 7.463E-05                        | 3.910E-05                          | 3.870E-05          | 3.870E-05          |
| 17.4                                         | 4.553E-05                        | 2.030E-05                          | 2.030E-05          | 2.020E-05          |
| 17.5                                         | 4.532E-05                        | 2.020E-05                          | 2.010E-05          | 2.000E-05          |
| 17.6                                         | 4.507E-05                        | 1.985E-05                          | 1.991E-05          | 1.987E-05          |
| 25.0                                         | 3.172E-05                        | 1.284E-05                          | 1.292E-05          | 1.283E-05          |

**Suwannee River NOM**

Path length = 0.2 cm

| <b>[SRNOM] = 0.1728 ± 0.0045 mM<sub>C</sub></b> |                                  | <b>Reading (W cm<sup>-2</sup>)</b> |                    |                    |
|-------------------------------------------------|----------------------------------|------------------------------------|--------------------|--------------------|
| <b>Water Temperature (°C)</b>                   | <b>Reference (I<sub>0</sub>)</b> | <b>Replicate 1</b>                 | <b>Replicate 2</b> | <b>Replicate 3</b> |
| 3.5                                             | 1.491E-04                        | 1.446E-04                          | 1.455E-04          | 1.438E-04          |
| 3.6                                             | 1.488E-04                        | 1.444E-04                          | 1.448E-04          | 1.434E-04          |
| 3.7                                             | 1.485E-04                        | 1.436E-04                          | 1.440E-04          | 1.430E-04          |
| 4.0                                             | 1.482E-04                        | 1.430E-04                          | 1.429E-04          | 1.424E-04          |
| 17.4                                            | 1.198E-04                        | 1.160E-04                          | 1.163E-04          | 1.156E-04          |
| 17.5                                            | 1.195E-04                        | 1.155E-04                          | 1.158E-04          | 1.151E-04          |
| 17.6                                            | 1.192E-04                        | 1.151E-04                          | 1.151E-04          | 1.146E-04          |
| 25.0                                            | 1.016E-04                        | 9.950E-05                          | 9.870E-05          | 9.720E-05          |
| <hr/>                                           |                                  |                                    |                    |                    |
| <b>[SRNOM] = 0.3555 ± 0.0013 mM<sub>C</sub></b> |                                  | <b>Reading (W cm<sup>-2</sup>)</b> |                    |                    |
| <b>Water Temperature (°C)</b>                   | <b>Reference (I<sub>0</sub>)</b> | <b>Replicate 1</b>                 | <b>Replicate 2</b> | <b>Replicate 3</b> |
| 3.5                                             | 1.491E-04                        | 1.319E-04                          | 1.359E-04          | 1.352E-04          |
| 3.6                                             | 1.488E-04                        | 1.316E-04                          | 1.352E-04          | 1.346E-04          |
| 3.7                                             | 1.485E-04                        | 1.312E-04                          | 1.348E-04          | 1.342E-04          |
| 4.0                                             | 1.482E-04                        | 1.306E-04                          | 1.338E-04          | 1.333E-04          |
| 17.4                                            | 1.198E-04                        | 1.056E-04                          | 1.083E-04          | 1.077E-04          |
| 17.5                                            | 1.195E-04                        | 1.050E-04                          | 1.075E-04          | 1.073E-04          |
| 17.6                                            | 1.192E-04                        | 1.046E-04                          | 1.070E-04          | 1.068E-04          |
| 25.0                                            | 1.016E-04                        | 8.890E-05                          | 9.130E-05          | 9.060E-05          |
| <hr/>                                           |                                  |                                    |                    |                    |
| <b>[SRNOM] = 0.4851 ± 0.0047 mM<sub>C</sub></b> |                                  | <b>Reading (W cm<sup>-2</sup>)</b> |                    |                    |
| <b>Water Temperature (°C)</b>                   | <b>Reference (I<sub>0</sub>)</b> | <b>Replicate 1</b>                 | <b>Replicate 2</b> | <b>Replicate 3</b> |
| 3.5                                             | 1.491E-04                        | 1.284E-04                          | 1.235E-04          | 1.227E-04          |
| 3.6                                             | 1.488E-04                        | 1.281E-04                          | 1.230E-04          | 1.259E-04          |
| 3.7                                             | 1.485E-04                        | 1.278E-04                          | 1.227E-04          | 1.255E-04          |
| 4.0                                             | 1.482E-04                        | 1.267E-04                          | 1.219E-04          | 1.244E-04          |
| 17.4                                            | 1.198E-04                        | 1.030E-04                          | 9.880E-05          | 1.008E-04          |
| 17.5                                            | 1.195E-04                        | 1.025E-04                          | 9.820E-05          | 1.003E-04          |
| 17.6                                            | 1.192E-04                        | 1.020E-04                          | 9.790E-05          | 1.000E-04          |
| 25.0                                            | 1.016E-04                        | 8.700E-05                          | 8.450E-05          | 8.460E-05          |

Path length = 0.5 cm

| <b>[SRNOM] = 0.1728 ± 0.0045 mM<sub>C</sub></b> |                                  | <b>Reading (W cm<sup>-2</sup>)</b> |                    |                    |
|-------------------------------------------------|----------------------------------|------------------------------------|--------------------|--------------------|
| <b>Water Temperature (°C)</b>                   | <b>Reference (I<sub>0</sub>)</b> | <b>Replicate 1</b>                 | <b>Replicate 2</b> | <b>Replicate 3</b> |
| 3.5                                             | 7.553E-05                        | 6.740E-05                          | 6.710E-05          | 6.670E-05          |
| 3.6                                             | 7.537E-05                        | 6.710E-05                          | 6.680E-05          | 6.670E-05          |
| 3.7                                             | 7.513E-05                        | 6.670E-05                          | 6.660E-05          | 6.610E-05          |
| 4.0                                             | 7.463E-05                        | 6.570E-05                          | 6.610E-05          | 6.540E-05          |
| 17.4                                            | 4.553E-05                        | 3.980E-05                          | 4.000E-05          | 4.010E-05          |
| 17.5                                            | 4.532E-05                        | 3.930E-05                          | 3.970E-05          | 3.960E-05          |
| 17.6                                            | 4.507E-05                        | 3.900E-05                          | 3.940E-05          | 3.930E-05          |
| 25.0                                            | 3.172E-05                        | 2.700E-05                          | 2.730E-05          | 2.720E-05          |
| <hr/>                                           |                                  |                                    |                    |                    |
| <b>[SRNOM] = 0.3555 ± 0.0013 mM<sub>C</sub></b> |                                  | <b>Reading (W cm<sup>-2</sup>)</b> |                    |                    |
| <b>Water Temperature (°C)</b>                   | <b>Reference (I<sub>0</sub>)</b> | <b>Replicate 1</b>                 | <b>Replicate 2</b> | <b>Replicate 3</b> |
| 3.5                                             | 7.553E-05                        | 5.760E-05                          | 5.630E-05          | 5.540E-05          |
| 3.6                                             | 7.537E-05                        | 5.720E-05                          | 5.590E-05          | 5.510E-05          |
| 3.7                                             | 7.513E-05                        | 5.680E-05                          | 5.570E-05          | 5.470E-05          |
| 4.0                                             | 7.463E-05                        | 5.570E-05                          | 5.490E-05          | 5.380E-05          |
| 17.4                                            | 4.553E-05                        | 3.480E-05                          | 3.330E-05          | 3.280E-05          |
| 17.5                                            | 4.532E-05                        | 3.450E-05                          | 3.300E-05          | 3.250E-05          |
| 17.6                                            | 4.507E-05                        | 3.420E-05                          | 3.280E-05          | 3.220E-05          |
| 25.0                                            | 3.172E-05                        | 2.440E-05                          | 2.260E-05          | 2.220E-05          |
| <hr/>                                           |                                  |                                    |                    |                    |
| <b>[SRNOM] = 0.4851 ± 0.0047 mM<sub>C</sub></b> |                                  | <b>Reading (W cm<sup>-2</sup>)</b> |                    |                    |
| <b>Water Temperature (°C)</b>                   | <b>Reference (I<sub>0</sub>)</b> | <b>Replicate 1</b>                 | <b>Replicate 2</b> | <b>Replicate 3</b> |
| 3.5                                             | 7.553E-05                        | 4.680E-05                          | 4.690E-05          | 4.730E-05          |
| 3.6                                             | 7.537E-05                        | 4.660E-05                          | 4.660E-05          | 4.690E-05          |
| 3.7                                             | 7.513E-05                        | 4.640E-05                          | 4.620E-05          | 4.670E-05          |
| 4.0                                             | 7.463E-05                        | 4.570E-05                          | 4.550E-05          | 4.600E-05          |
| 17.4                                            | 4.553E-05                        | 2.750E-05                          | 2.750E-05          | 2.760E-05          |
| 17.5                                            | 4.532E-05                        | 2.740E-05                          | 2.720E-05          | 2.740E-05          |
| 17.6                                            | 4.507E-05                        | 2.720E-05                          | 2.700E-05          | 2.720E-05          |
| 25.0                                            | 3.172E-05                        | 1.885E-05                          | 1.881E-05          | 1.889E-05          |

*Raw Surface Water*

| Path length = 0.2 cm   |                             | Reading (W cm <sup>-2</sup> ) |             |             |
|------------------------|-----------------------------|-------------------------------|-------------|-------------|
| Water Temperature (°C) | Reference (I <sub>0</sub> ) | Replicate 1                   | Replicate 2 | Replicate 3 |
| 3.5                    | 1.491E-04                   | 1.400E-04                     | 1.414E-04   | 1.417E-04   |
| 3.6                    | 1.488E-04                   | 1.397E-04                     | 1.411E-04   | 1.413E-04   |
| 3.7                    | 1.485E-04                   | 1.393E-04                     | 1.405E-04   | 1.408E-04   |
| 4.0                    | 1.482E-04                   | 1.386E-04                     | 1.396E-04   | 1.399E-04   |
| 17.4                   | 1.198E-04                   | 1.107E-04                     | 1.118E-04   | 1.120E-04   |
| 17.5                   | 1.195E-04                   | 1.102E-04                     | 1.114E-04   | 1.116E-04   |
| 17.6                   | 1.192E-04                   | 1.096E-04                     | 1.107E-04   | 1.111E-04   |
| 25.0                   | 1.016E-04                   | 9.240E-05                     | 9.430E-05   | 9.460E-05   |
| <hr/>                  |                             |                               |             |             |
| Path length = 0.5 cm   |                             | Reading (W cm <sup>-2</sup> ) |             |             |
| Water Temperature (°C) | Reference (I <sub>0</sub> ) | Replicate 1                   | Replicate 2 | Replicate 3 |
| 3.5                    | 7.553E-05                   | 5.850E-05                     | 5.610E-05   | 5.790E-05   |
| 3.6                    | 7.537E-05                   | 5.810E-05                     | 5.580E-05   | 5.750E-05   |
| 3.7                    | 7.513E-05                   | 5.770E-05                     | 5.550E-05   | 5.700E-05   |
| 4.0                    | 7.463E-05                   | 5.700E-05                     | 5.470E-05   | 5.620E-05   |
| 17.4                   | 4.553E-05                   | 3.435E-05                     | 3.290E-05   | 3.390E-05   |
| 17.5                   | 4.532E-05                   | 3.400E-05                     | 3.260E-05   | 3.360E-05   |
| 17.6                   | 4.507E-05                   | 3.360E-05                     | 3.220E-05   | 3.330E-05   |
| 25.0                   | 3.172E-05                   | 2.320E-05                     | 2.230E-05   | 2.280E-05   |
| <hr/>                  |                             |                               |             |             |
| Path length = 1.0 cm   |                             | Reading (W cm <sup>-2</sup> ) |             |             |
| Water Temperature (°C) | Reference (I <sub>0</sub> ) | Replicate 1                   | Replicate 2 | Replicate 3 |
| 3.5                    | 3.157E-05                   | 1.561E-05                     | 1.468E-05   | 1.494E-05   |
| 3.6                    | 3.142E-05                   | 1.555E-05                     | 1.463E-05   | 1.490E-05   |
| 3.7                    | 3.125E-05                   | 1.553E-05                     | 1.459E-05   | 1.486E-05   |
| 4.0                    | 3.068E-05                   | 1.547E-05                     | 1.445E-05   | 1.468E-05   |
| 17.4                   | 1.251E-05                   | 6.060E-06                     | 5.870E-06   | 6.030E-06   |
| 17.5                   | 1.244E-05                   | 6.030E-06                     | 5.810E-06   | 6.000E-06   |
| 17.6                   | 1.236E-05                   | 5.990E-06                     | 5.770E-06   | 5.960E-06   |
| 25.0                   | 6.937E-06                   | 3.440E-06                     | 3.340E-06   | 3.480E-06   |

The reported measured absorption in Table 5 is the average value of the three path lengths used.



#### D. Spectral response of the 185 nm detector (SED185)

In Figure D.1, the spectral response for the 185 nm detector is provided. This information can be found in the [manufacturer's website](#). As it is seen, there is no response at 254 nm and has a near maximum response at 185 nm.

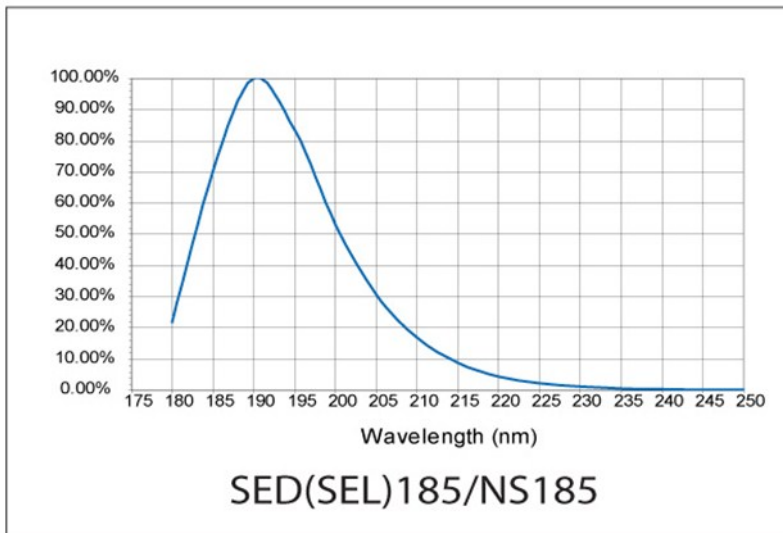

Figure D. 1 Spectral response of the detector used in the absorption experiments.

## References

1. Heraeus. Suprasil UVL [Internet]. [cited 2015 Nov 8]. Available from: [http://heraeus-quarzglas.com/media/webmedia\\_local/downloads/broschren\\_mo/Suprasil\\_UVL\\_synthetic\\_fused\\_silica.pdf](http://heraeus-quarzglas.com/media/webmedia_local/downloads/broschren_mo/Suprasil_UVL_synthetic_fused_silica.pdf)
2. Griesmann U, Burnett JH. Refractivity of nitrogen gas in the vacuum ultraviolet. *Opt Lett* [Internet]. Optical Society of America; 1999 Dec 1 [cited 2018 Feb 13];24(23):1699. Available from: <https://www.osapublishing.org/abstract.cfm?URI=ol-24-23-1699>
3. Daimon M, Masumura A. Measurement of the refractive index of distilled water from the near-infrared region to the ultraviolet region. *Appl Opt*. 2007;46(18):3811–20.
4. Goldring LS, Hawesz RC, Hare GH, Beckmdn A, Stickney ME. Anomalies in Extinction Coefficient Measurements. *Anal Chem J*. 1953;25(6):869–78.
